# Supplementary material for: Synthesis of novel conjugated polymers based on benzo[1,2-d:4,5-d′]-bis([1,2,3]triazole) for applications in organic field-effect transistors
Source: Royal Society of Chemistry journal article supplement (doi:10.1039/c8py01526k), 2019-01-01
Supplement: c8py01526k1.pdf [file c8py01526k1.pdf]

## Supporting Information

# Synthesis of Novel Conjugated Polymers Based on Benzo[1,2-*d*:4,5-*d'*]-bis([1,2,3]triazole) for Applications in Organic Field-Effect Transistors

Yao-Ming Yeh, Chiao-Hui Huang, Shih-Hao Peng, Chia-Chih Chang\* and Chain-Shu Hsu\*

Department of Applied Chemistry, National Chiao Tung University, 1001 Ta Hsueh Road, Hsin-Chu, 30010 Taiwan  
E-mail: [cshsu@mail.nctu.edu.tw](mailto:cshsu@mail.nctu.edu.tw)

### CONTENT

1. Molecular weight and polydispersity index
2. NMR spectra of polymers
3. OFET device performances of three polymers.
4. Polymer structure in reference

**Table S1.** The molecular weights and polydispersity indexes (PDI) of **PBTBBTa-BT**, **PBTBBTa-TT** and **PBTBBTa-TVT**.

| Polymer            | Mn(kDa) | Mw(kDa) | PDI(kDa) |
|--------------------|---------|---------|----------|
| <b>PBTBBTa-BT</b>  | 39.0    | 56.8    | 1.45     |
| <b>PBTBBTa-TT</b>  | 18.2    | 43.5    | 2.39     |
| <b>PBTBBTa-TVT</b> | 31.0    | 57.8    | 1.86     |

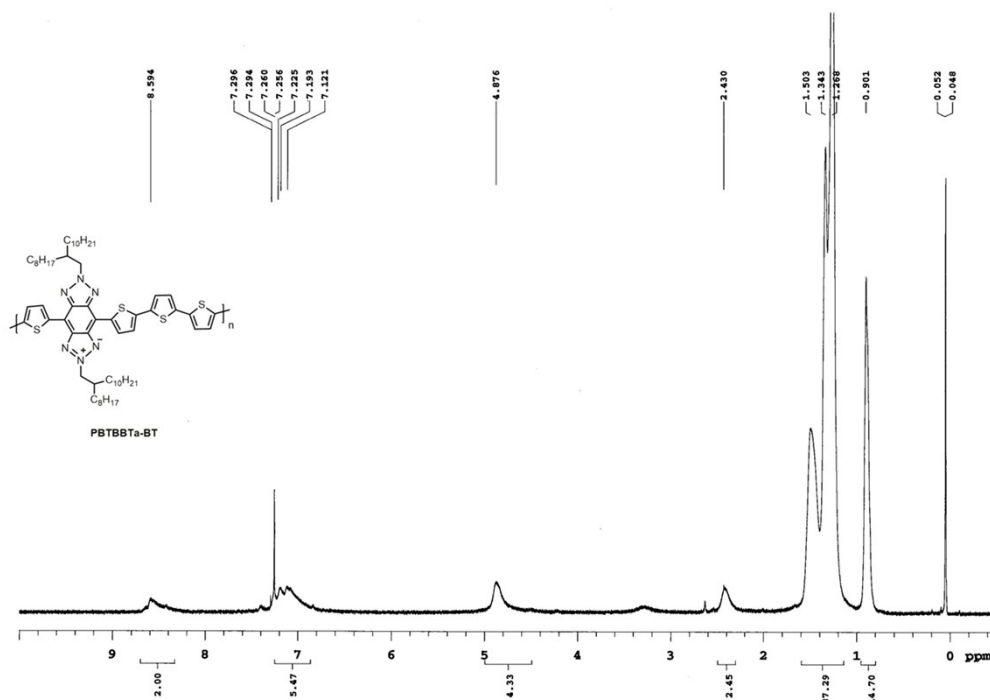

**Fig. S1**  $^1\text{H}$  NMR spectrum of polymer **PBTBBTa -BT**

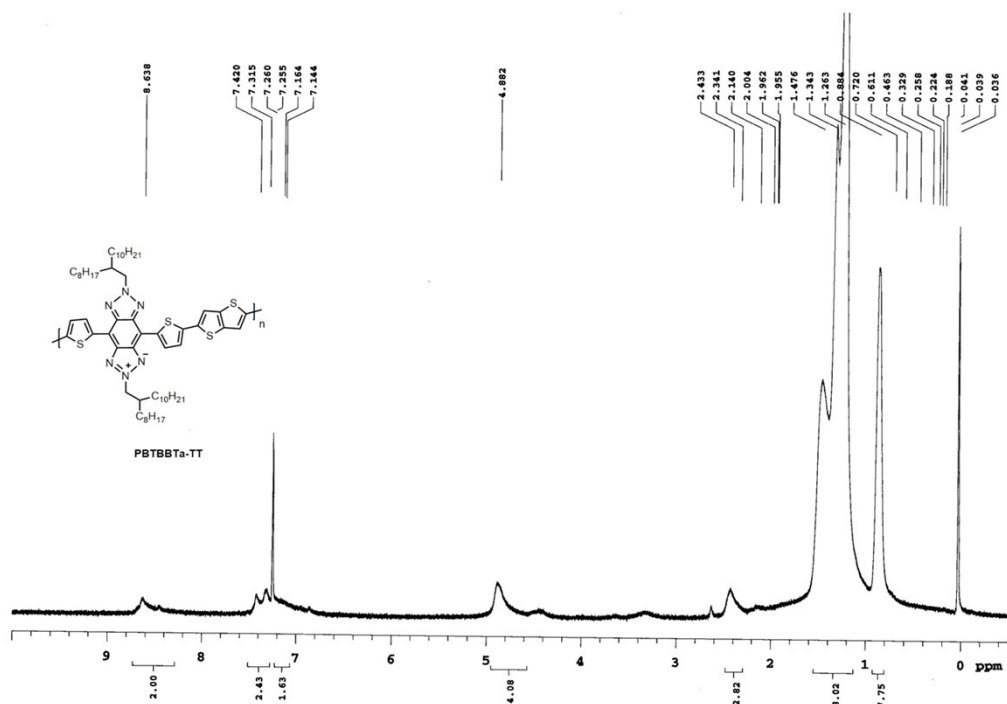

**Fig. S2**  $^1\text{H}$  NMR spectrum of polymer **PBTBBTa-TVT**

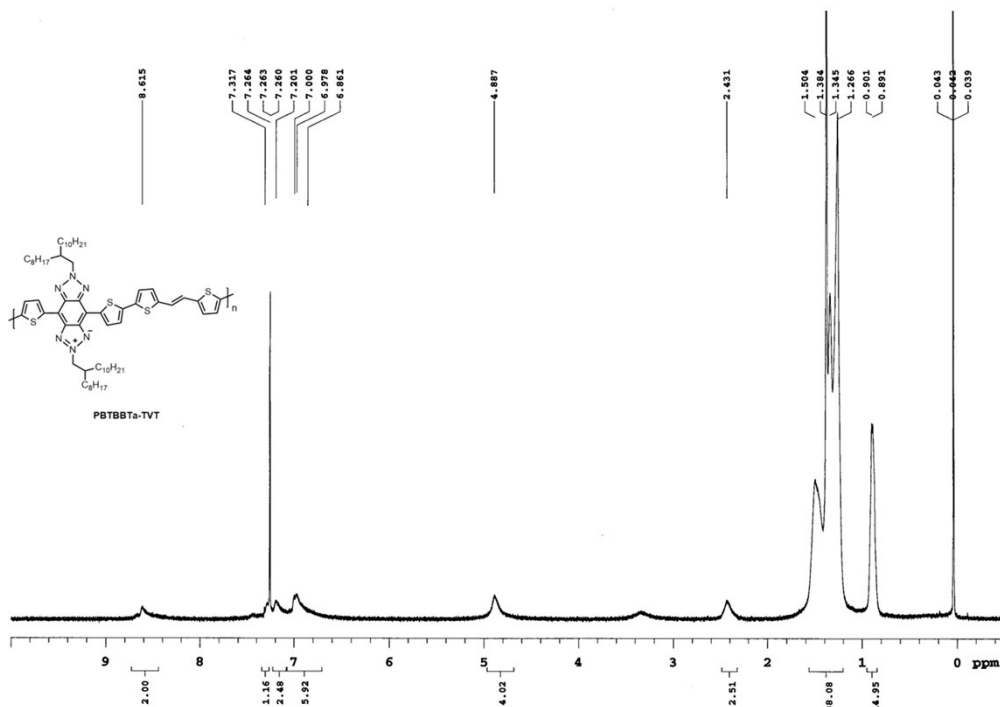

**Fig. S3**  $^1\text{H}$  NMR spectrum of polymer **PBTBBTa-SVS**

**Table S2** OFET device performances of **PBTBBT<sub>a</sub>-BT**

| Device | Annealing Temp (°C) | Annealing Time (min) | $V_T$ (V) | $I_{on/off}$      | Mobility ( $\text{cm}^2 \text{V}^{-1} \text{s}^{-1}$ ) |
|--------|---------------------|----------------------|-----------|-------------------|--------------------------------------------------------|
| 1      | N/A                 | 10                   | -3.2      | $8.4 \times 10^4$ | $5.1 \times 10^{-2}$                                   |
| 2      | 50                  | 10                   | -11.6     | $3.7 \times 10^4$ | <b>0.22</b>                                            |
| 3      | 150                 | 10                   | -4.6      | $3.4 \times 10^4$ | $3.8 \times 10^{-2}$                                   |
| 4      | 200                 | 10                   | -5.3      | $1.7 \times 10^4$ | $7.4 \times 10^{-2}$                                   |
| 5      | 280                 | 10                   | -9.7      | $1.6 \times 10^6$ | <b>0.21</b>                                            |
| 6      | 50                  | 30                   | -3.8      | $1.1 \times 10^3$ | $3.9 \times 10^{-2}$                                   |
| 7      | 280                 | 30                   | -12.4     | $5.6 \times 10^3$ | $3.2 \times 10^{-2}$                                   |

**Table S3** OFET device performances of **PBTBBT<sub>a</sub>-TT**

| Device | Annealing Temp (°C) | Annealing Time (min) | $V_T$ (V) | $I_{on/off}$      | Mobility ( $\text{cm}^2 \text{V}^{-1} \text{s}^{-1}$ ) |
|--------|---------------------|----------------------|-----------|-------------------|--------------------------------------------------------|
| 8      | N/A                 | 10                   | -8.6      | $5.5 \times 10^4$ | $6.6 \times 10^{-2}$                                   |
| 9      | 100                 | 10                   | -0.4      | $1.2 \times 10^3$ | $9.0 \times 10^{-2}$                                   |
| 10     | 150                 | 10                   | -7.6      | $8.3 \times 10^4$ | <b>0.13</b>                                            |
| 11     | 250                 | 10                   | -9.7      | $1.6 \times 10^6$ | $7.4 \times 10^{-2}$                                   |
| 12     | 150                 | 30                   | -14.7     | $2.3 \times 10^1$ | $4.8 \times 10^{-2}$                                   |

**Table S4** OFET device performances of **PBTBBT**a-TV**T**

| Device | Annealing<br>Temp (°C) | Annealing<br>Time (min) | $V_T$ (V) | $I_{on/off}$      | Mobility<br>( $\text{cm}^2 \text{V}^{-1} \text{s}^{-1}$ ) |
|--------|------------------------|-------------------------|-----------|-------------------|-----------------------------------------------------------|
| 14     | N/A                    | 10                      | -12       | $1.3 \times 10^4$ | $1.3 \times 10^{-2}$                                      |
| 15     | 70                     | 10                      | -10       | $7.1 \times 10^3$ | $1.4 \times 10^{-2}$                                      |
| 16     | 150                    | 10                      | -4        | $3.9 \times 10^3$ | $1.2 \times 10^{-2}$                                      |
| 17     | 250                    | 10                      | -7.2      | $8.1 \times 10^3$ | <b><math>3.1 \times 10^{-2}</math></b>                    |
| 18     | 250                    | 30                      | -10.3     | $2.5 \times 10^3$ | $1.8 \times 10^{-2}$                                      |

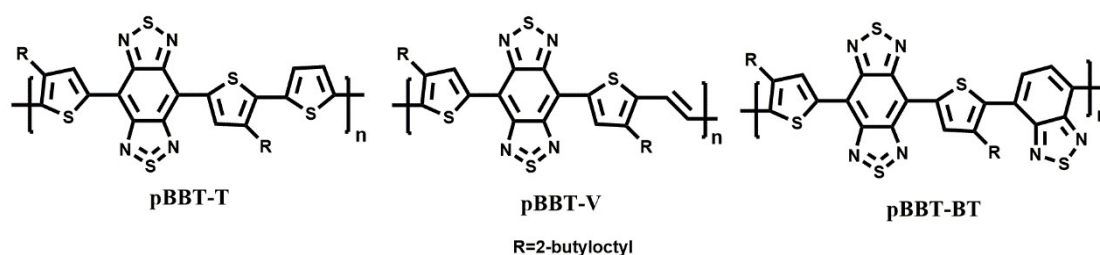**Fig. S4** Polymer structure of **pBBT-T**, **pBBT-V** and **pBBT-BT**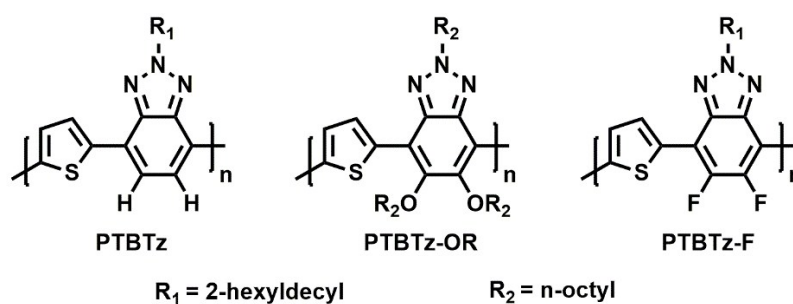**Fig. S5** Polymer structure of **PTBTz**, **PTBTz-OR** and **PTBTz-F****Reference**

- Wang, y.; Hosokawa, R.; Mori, T.; Michinobu, T. *Bull. Chem. Soc. Jpn* **2017**, 90, 1041–1049.
- Yum, S; An, T. K.; Wang, X.; Lee, W.; Uddin, M. A.; Kim, Y. J.; Nguyen, T. L.; Xu, S.; Hwang, S.; Park, C. E.; Woo, H. Y. *Chem. Mater.* **2014**, 26, 2147–2154.
